# Supplementary material for: Cytochrome c speeds up caspase cascade activation by blocking 14-3-3ε-dependent Apaf-1 inhibition
Source: PubMed Central journal article supplement (PMC5840378; doi:10.1038/s41419-018-0408-1), 2018-03-06
Supplement: 41419_2018_408_MOESM1_ESM.pdf [file 41419_2018_408_MOESM1_ESM.pdf]

1

2

3 **Cytochrome c speeds up caspase cascade activation by blocking 14-3-3ε-**  
4 **dependent Apaf-1 inhibition**

5

6 **Supplementary Information**

7

8 Carlos A. Elena-Real<sup>1</sup>, Antonio Díaz-Quintana<sup>1</sup>, Katuska González-Arzola<sup>1</sup>,  
9 Adrián Velázquez-Campoy<sup>2</sup>, Mar Orzáez<sup>3</sup>, Abelardo López-Rivas<sup>4</sup>, Sergio Gil-  
10 Caballero<sup>1</sup>, Miguel A. De la Rosa<sup>1,\*</sup> and Irene Díaz-Moreno<sup>1,\*</sup>

11

12 <sup>1</sup>Instituto de Investigaciones Químicas (IIQ) – Centro de Investigaciones  
13 Científicas Isla de la Cartuja (cicCartuja), Universidad de Sevilla – Consejo  
14 Superior de Investigaciones Científicas (CSIC), Sevilla, Spain.

15 <sup>2</sup>Institute of Biocomputation and Physics of Complex Systems (BIFI), Joint Unit  
16 IQFR-CSIC-BIFI, Universidad de Zaragoza, Zaragoza, Spain.

17 <sup>3</sup>Centro de Investigación Príncipe Felipe, Valencia, Spain.

18 <sup>4</sup>Centro Andaluz de Biología Molecular y Medicina Regenerativa-CABIMER,  
19 CSIC-Universidad de Sevilla-Universidad Pablo de Olavide, Sevilla, Spain.

20

21 **\*Corresponding authors:**

22 Emails: [idadmoreno@us.es](mailto:idadmoreno@us.es); [marosa@us.es](mailto:marosa@us.es)

23 Telephone number: +34 954489513; Fax number: +34 954460065

## 24 **Structural model of the 14-3-3 $\epsilon$ full length protein in its open conformation**

25 Several molecular structures of 14-3-3 $\epsilon$  are available in the Protein Data Bank.  
26 All these structures show a homodimer that lacks the C-terminal tails  
27 corresponding to residues from 234 to 255. However, given the role of these tails  
28 in the recognition of Cc, we built a structural model of 14-3-3 $\epsilon$  FL, including the  
29 C-terminal tails, based on computational analysis.

30 First, we performed molecular dynamics (MD) calculations of the isolated C-  
31 terminal tail of 14-3-3 $\epsilon$  (14-3-3 $\epsilon_{234-255}$ ). The root-mean-square deviation (RMSD)  
32 and radius of gyration ( $R_{\text{gyr}}$ ) data remained stable after the first 20 ns  
33 (Supplementary Figure S7a). To obtain a representative structure of the 14-3-  
34 3 $\epsilon_{234-255}$  peptide during time with stable RMSD and  $R_{\text{gyr}}$  values, the structure with  
35 the lower RMSD respect to the average from the last 40 ns was selected  
36 (Supplementary Figure S7b). Despite being highly dynamic, the 14-3-3 $\epsilon_{234-255}$   
37 peptide formed secondary structure elements, such as  $\alpha$ -helices that remain  
38 throughout the computation.

39 The model of 14-3-3 $\epsilon_{234-255}$  peptide was bound to the crystallographic structure  
40 of 14-3-3 $\epsilon_{1-233}$  (Supplementary Figure S1) to obtain an initial 14-3-3 $\epsilon$  FL (stretch  
41 from 1 to 255 residues) model. Conformational changes have been previously  
42 described for 14-3-3 proteins enabling them to switch from closed to open  
43 conformations upon binding with their partners.<sup>15</sup> To obtain an open conformation  
44 that could accommodate Cc (see below), MD calculations were carried out  
45 removing the two consensus ligands bound to 14-3-3 $\epsilon$  present in the  
46 crystallographic structure (PDB: 2BR9). This guarantees flexibility and the  
47 opening of the protein structure.

48 The statistical parameters of 14-3-3 $\epsilon$  FL showed high dynamism (Supplementary  
49 Figure S5c, *upper*). The large RMSD and  $R_{\text{gyr}}$  values (red lines) suggest that the  
50 behaviour of 14-3-3 $\epsilon$  FL is considerably dynamic in this open state  
51 (Supplementary Figure S7c). On the contrary, the core of 14-3-3 $\epsilon$ , ranging from  
52 residues 1 to 233, was characterized by RMSD values substantially smaller than  
53 those for 14-3-3 $\epsilon$  FL, indicating that the C-terminal tails are highly dynamic  
54 (Supplementary Figure S7c, blue line).

55 The closest structure to the average was selected from the last 5 ns of MD  
56 computation (Supplementary Figure S7d). This resulting model of 14-3-3 $\epsilon$  FL was  
57 used as input in the docking calculations.

58

59

60

61 **SUPPLEMENTARY TABLES**

62

63 **Table S1: Thermodynamic values inferred from ITC measurements**

64

| <b>Protein complex</b>                                                | <b><math>K_D</math> (<math>\mu\text{M}</math>)</b> | <b><math>\Delta H</math> (<math>\text{kcal mol}^{-1}</math>)</b> | <b><math>n</math></b> |
|-----------------------------------------------------------------------|----------------------------------------------------|------------------------------------------------------------------|-----------------------|
| <b>Cc / 14-3-3<math>\epsilon</math> FL WT</b>                         | 2.3                                                | 1.4                                                              | 1.70                  |
| <b>Cc / 14-3-3<math>\epsilon</math> FL D21K</b>                       | 13.0                                               | 8.3                                                              | 1.06*                 |
| <b>Cc / 14-3-3<math>\epsilon</math> FL K50E</b>                       | 11.0                                               | 3.1                                                              | 0.86*                 |
| <b>Cc / 14-3-3<math>\epsilon</math> FL S59E</b>                       | 16.0                                               | 5.8                                                              | 0.86*                 |
| <b>Cc / 14-3-3<math>\epsilon</math> FL E92K</b>                       | 11.0                                               | 6.7                                                              | 1.20*                 |
| <b>Cc / 14-3-3<math>\epsilon</math> FL D99K</b>                       | 16.0                                               | 7.7                                                              | 1.64                  |
| <b>Cc / 14-3-3<math>\epsilon</math> FL S187D</b>                      | 12.0                                               | 1.3                                                              | 1.50                  |
| <b>Cc / 14-3-3<math>\epsilon</math> core</b>                          | 7.6                                                | 0.8                                                              | 1.40                  |
| <b>Cc / 14-3-3<math>\epsilon</math><sub>234-255</sub></b>             | 16.0                                               | 1.4                                                              | 0.95                  |
| <b>Cc / 14-3-3<math>\epsilon</math><sub>234-255</sub>(acetylated)</b> | 23.0                                               | 1.5                                                              | 0.95                  |

65

66 Thermodynamic equilibrium parameters for the interaction of *wild-type* and  
67 mutant 14-3-3 $\epsilon$  species with reduced Cc. Equilibrium dissociation constant ( $K_D$ ),  
68 enthalpy ( $\Delta H$ ) and reaction stoichiometry ( $n$ ) are shown. Asterisks indicate those  
69 stoichiometry values markedly lower than that for the interaction between Cc and  
70 14-3-3 $\epsilon$  FL WT. Relative errors:  $K_D$  20%,  $\Delta H$  5%.

71

72 **Table S2. Statistical analysis of HADDOCK data after clustering the solutions**73 *14-3-3 $\epsilon$  open conformation - Lys244 AIR*

| Clusters | RMSD (Å)    | Size | $E_{\text{inter}}$ (kcal mol <sup>-1</sup> ) | $E_{\text{vdw}}$ (kcal mol <sup>-1</sup> ) | $E_{\text{elec}}$ (kcal mol <sup>-1</sup> ) | AIRviol (Å) | BSA (Å <sup>2</sup> ) | Binding site on 14-3-3 $\epsilon$ |
|----------|-------------|------|----------------------------------------------|--------------------------------------------|---------------------------------------------|-------------|-----------------------|-----------------------------------|
| # 1      | 1.96 ± 1.27 | 54   | -309.41 ± 59.8                               | -35.15 ± 9.79                              | -349.94 ± 52.06                             | 2.44 ± 1.15 | 1766 ± 233            | Convex                            |
| # 2      | 4.98 ± 1.74 | 46   | -290.34 ± 57.38                              | -34.09 ± 10.41                             | -351.16 ± 55.61                             | 2.85 ± 0.95 | 1710 ± 264            | Convex                            |
| # 3      | 2.13 ± 1.76 | 21   | -281.97 ± 51.16                              | -29.05 ± 7.1                               | -312.93 ± 51.84                             | 2.10 ± 0.87 | 1618 ± 190            | Convex                            |
| # 4      | 6.34 ± 2.84 | 7    | -385.26 ± 118                                | -21.30 ± 14.38                             | -556.57 ± 98.07                             | 3.86 ± 1.55 | 1620 ± 396            | Concave                           |

74

75 *14-3-3 $\epsilon$  open conformation + Lys244 AIR*

| Clusters | RMSD (Å)    | Size | $E_{\text{inter}}$ (kcal mol <sup>-1</sup> ) | $E_{\text{vdw}}$ (kcal mol <sup>-1</sup> ) | $E_{\text{elec}}$ (kcal mol <sup>-1</sup> ) | AIRviol (Å) | BSA (Å <sup>2</sup> ) | Binding site on 14-3-3 $\epsilon$ |
|----------|-------------|------|----------------------------------------------|--------------------------------------------|---------------------------------------------|-------------|-----------------------|-----------------------------------|
| # 1      | 4.20 ± 1.66 | 35   | -345.88 ± 90.5                               | -32.17 ± 10.12                             | -454.14 ± 87.43                             | 3.57 ± 1.52 | 1709 ± 235            | Concave                           |
| # 2      | 1.77 ± 0.69 | 30   | -252.51 ± 66.72                              | -23.20 ± 6.09                              | -451.22 ± 67.87                             | 5.07 ± 1.29 | 1380 ± 113            | Concave                           |
| # 3      | 3.45 ± 1.18 | 24   | -327.26 ± 77.21                              | -24.00 ± 10.21                             | -460.74 ± 77.34                             | 3.54 ± 1.00 | 1572 ± 266            | Concave                           |
| # 4      | 1.34 ± 0.57 | 8    | -307.3 ± 86.36                               | -34.27 ± 11.49                             | -345.52 ± 73.75                             | 2.62 ± 1.11 | 1772 ± 244            | Convex                            |

76

77  $E_{\text{inter}}$ ,  $E_{\text{vdw}}$  and  $E_{\text{elec}}$  stand for intermolecular, van der Waals and electrostatic energy terms, respectively.  $E_{\text{inter}}$  is the sum of all  
 78 energy contributions. BSA and AIRviol stand for Buried Surface Area and AIRs violations, respectively.

79

80



97  
98  
99  
100  
101  
102  
103

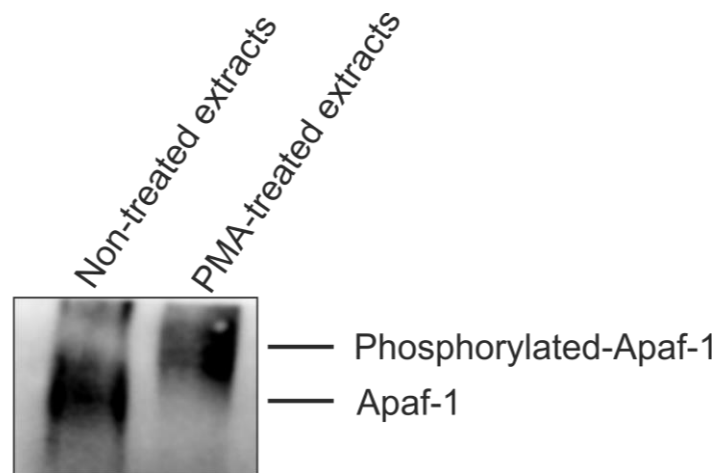

104  
105  
106  
107  
108  
109  
110  
111  
112  
113

**Figure S2. Detection of phosphorylated Apaf-1 upon PMA treatment.**

Western-blot analysis of non-treated and PMA-treated lysates upon Apaf-1 immunoprecipitation, using a Phos-tag<sup>TM</sup> SDS-PAGE and an anti-Apaf-1 antibody. Phosphorylated Apaf-1 showed a reduced electrophoretic mobility.

114

115

116

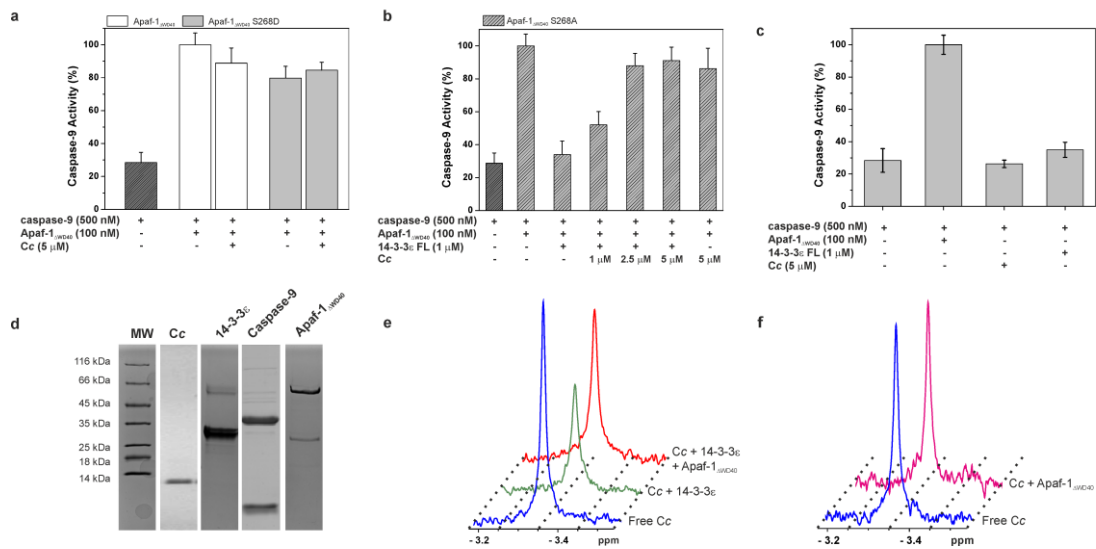

117

118

119

120 **Figure S3. Controls experiments for the *in vitro* assays of caspase-9 activity**

121 **(a)** Effect of Cc on the caspase-9 activity triggered by Apaf-1<sub>ΔWD40</sub> WT and the  
122 mutant S268D. **(b)** Apaf-1<sub>ΔWD40</sub> S268A-mediated caspase-9 activity upon addition  
123 of 14-3-3ε FL at increasing concentrations of Cc. **(c)** Effect of Cc and 14-3-3ε on  
124 caspase-9 activity in the absence of Apaf-1<sub>ΔWD40</sub>. **(d)** SDS PAGE of the  
125 recombinant proteins used in caspase-9 activity assays. **(e, f)** 1D <sup>1</sup>H NMR spectra  
126 showing the Met-80 methyl signal of reduced Cc upon successive additions of  
127 14-3-3ε and Apaf-1<sub>ΔWD40</sub> **(e)** or upon addition of Apaf-1<sub>ΔWD40</sub> alone **(f)**; protein  
128 concentration was 13 μM reduced Cc, 13 μM 14-3-3ε and 5 μM Apaf-1<sub>ΔWD40</sub>.

129

130



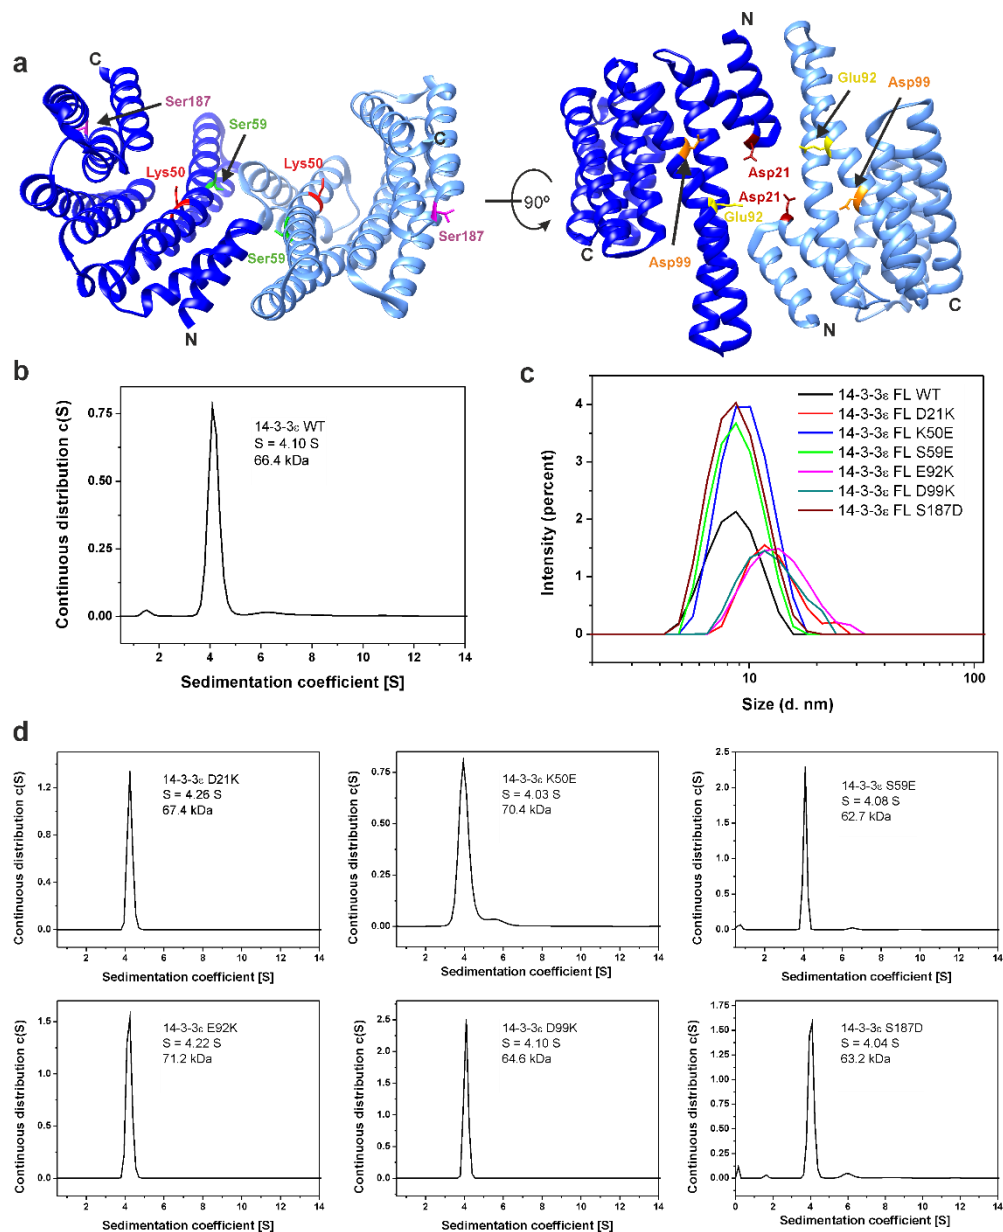

131

132 **Figure S4. Dimerization state of 14-3-3 $\epsilon$  species**

133 (a) Structure of 14-3-3 $\epsilon_{1-233}$  (PDB: 2BR9) highlighting residues Asp21 (dark red),

134 Lys50 (red), Ser59 (green), Glu92 (yellow), Asp99 (orange) and Ser187 (purple).

135 (b) Sedimentation velocity measurement of 14-3-3 FL WT. S is the sedimentation

136 coefficient. (c) Particle size obtained by dynamic light scattering with 14-3-3 $\epsilon$  FL

137 species. (d) As panel B for mutant 14-3-3 $\epsilon$  FL species.

138

139

140

141

142

143

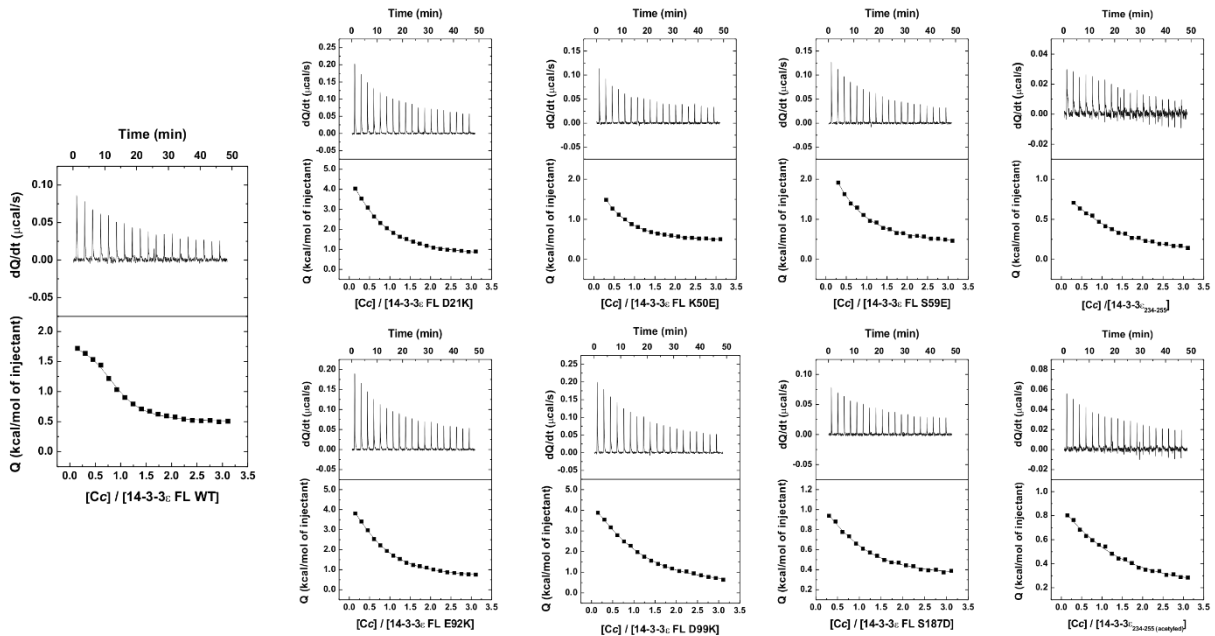

144 **Figure S5. ITC binding assay of Cc / 14-3-3 $\epsilon$  FL complexes**

145 The thermograms and binding isotherms (*top and bottom*, respectively) of  
146 reduced Cc with WT and mutant species of 14-3-3 $\epsilon$  are shown.

147

148

149

150

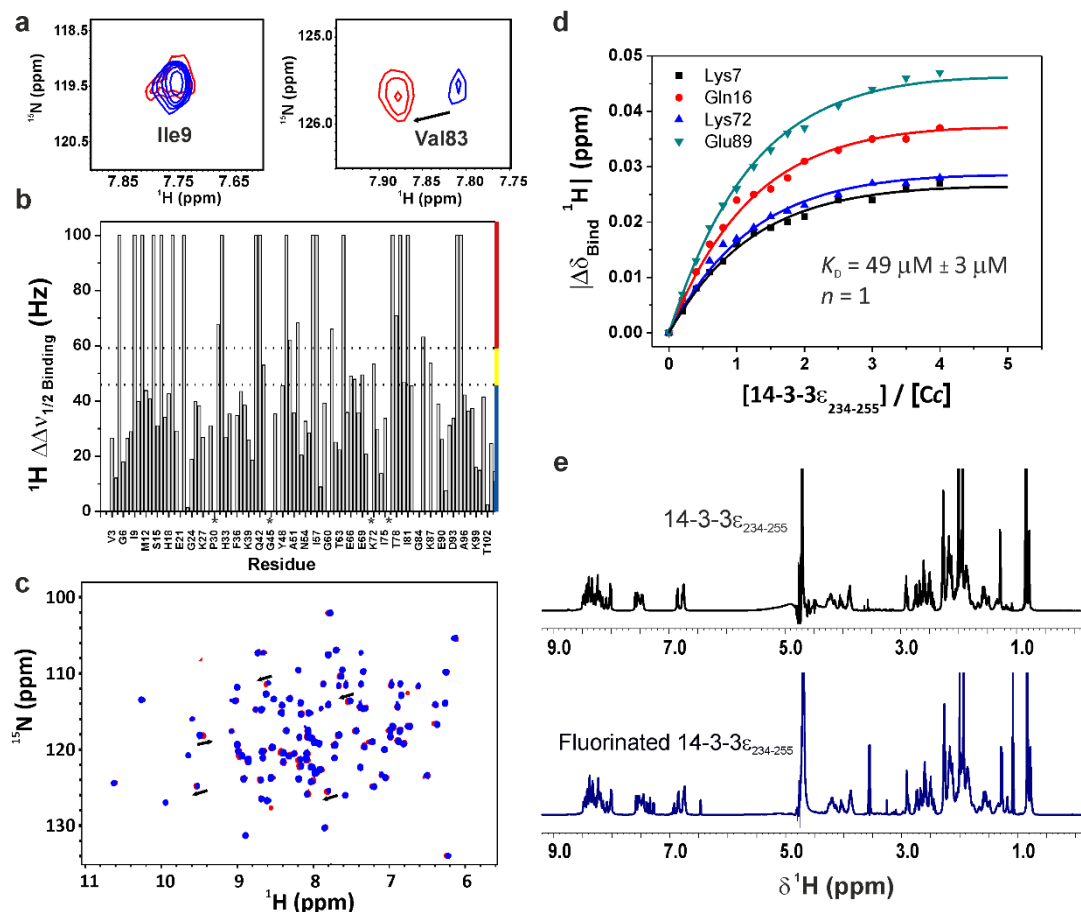

151

152 **Figure S6. Binding of Cc to 14-3-3 $\epsilon$  constructs monitored by NMR**

153 (a) Detail of superimposed 2D  $^1\text{H}$ ,  $^{15}\text{N}$  HSQC spectra of  $^{15}\text{N}$  labelled Cc ( $\text{Fe}^{2+}$ ),  
 154 either free (blue) or bound to 14-3-3 $\epsilon$  FL in a Cc:14-3-3 $\epsilon$  ratio of 1:0.75 (red). (b)  
 155  $^1\text{H}$  line-width differences ( $^1\text{H} \Delta\Delta\nu_{1/2}$  Binding) between free and 14-3-3 $\epsilon$  FL-bound Cc.  
 156 Resonance broaden beyond the threshold corresponding to the average plus 1-  
 157 fold standard deviation (45.9 Hz) are in yellow. Signals with a line-width larger  
 158 than the average value plus 2-fold standard deviation (59.2 Hz) are in red.  
 159 Asterisks mark prolines. (c) Superimposed 2D  $^1\text{H}$ ,  $^{15}\text{N}$  HSQC spectra of  $^{15}\text{N}$ -  
 160 labeled Cc, which is either free (blue) or bound to 14-3-3 $\epsilon_{234-255}$  at Cc:14-3-3 $\epsilon_{234-}$   
 161  $_{255}$  molar ratio of 1:7. (d) Curves representing the best global fit of several amide  
 162 signals of Cc in direct dimension to a 1:1 14-3-3 $\epsilon_{234-255}$ :Cc binding model. (e) 1D  
 163  $^1\text{H}$  NMR spectra of 14-3-3 $\epsilon_{234-255}$  before (upper) and after (lower) conjugation  
 164 reaction with 5-fluorindole compound.

165

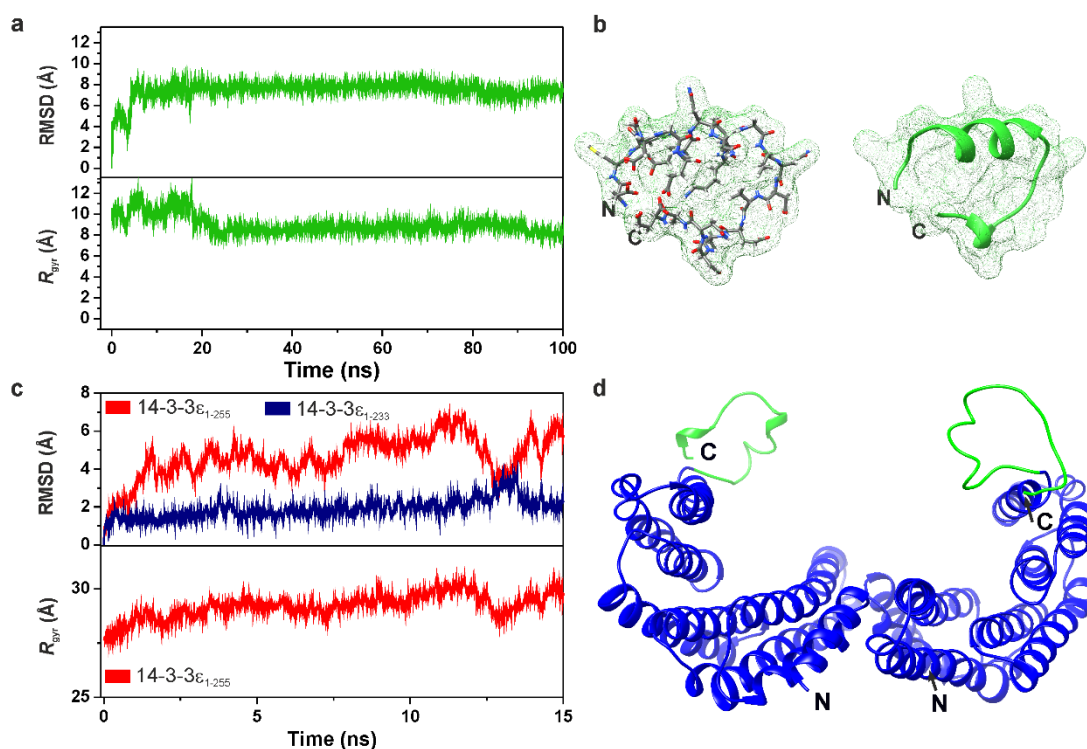

166

167 **Figure S7. Molecular Dynamics analysis of 14-3-3<sub>ε234-255</sub> peptide and 14-3-**  
 168 **3<sub>ε</sub> FL**

169 (a) Analysis of the 100 ns MD trajectories of 14-3-3<sub>ε234-255</sub>. The time evolution of  
 170 the backbone RMSD values and the radius of gyration ( $R_{gyr}$ ) are represented in  
 171 *upper* and *lower* panel, respectively. (b) Representation of the closest structure  
 172 to the average one from the last 40 ns of the computation. Representation as  
 173 atoms and bonds is in the *left* panel and ribbon representation is in the *right* panel.  
 174 (c) Analysis of the trajectories from MD of 14-3-3<sub>ε</sub> FL (14-3-3<sub>ε1-255</sub>) protein.  
 175 Backbone RMSD values along the trajectories of 14-3-3<sub>ε</sub> FL and 14-3-3<sub>ε</sub> core  
 176 (14-3-3<sub>ε1-233</sub>) are represented in red and blue, respectively. The time evolution of  
 177 the backbone  $R_{gyr}$  values for 14-3-3<sub>ε</sub> FL is represented in red (*lower* panel). (d)  
 178 The closest structure to the average one obtained from the last 5 ns of the  
 179 computation. The resulting model is represented in blue with the 14-3-3<sub>ε234-255</sub> tail  
 180 colored in green.

181

182

183

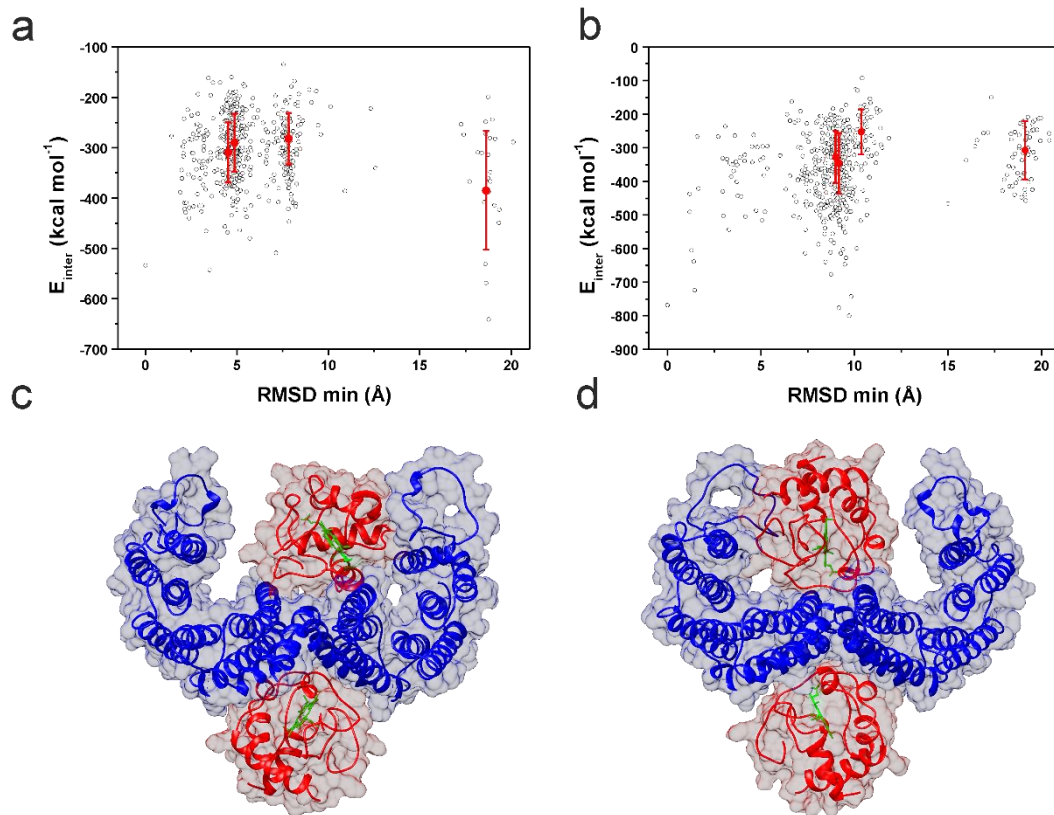

184

185 **Figure S8. HADDOCK molecular docking of Cc and 14-3-3 $\epsilon$  FL without (*left***  
186 **panels) or with (*right* panels) Lys244 from 14-3-3 $\epsilon$  included in the**  
187 **calculations as an active residue**

188 (a, b)  $E_{inter}$  values represented as a function of their RMSD values. White dots  
189 correspond to the individual structures and red dots correspond to the cluster  
190 averages with the standard deviation indicated by bars. (c, d) Transparent  
191 surfaces, along with ribbons, of the best two complex models with minimal  $E_{inter}$   
192 at either the concave or convex binding site of 14-3-3 $\epsilon$ . 14-3-3 $\epsilon$  FL is represented  
193 in blue, Cc in red and heme group is colored in green.

194

195 **SUPPLEMENTARY REFERENCES**

196

- 197 1. Yang, X. et al. Structural basis for protein-protein interactions in the 14-  
198 3-3 protein family. *Proc Natl Acad Sci USA* **103**, 17237-17242 (2006).
